# Supplementary material for: A novel sensitive ACNTs–MoO2 SERS substrate boosted by synergistic enhancement effect
Source: Royal Society of Chemistry journal article supplement (doi:10.1039/d1cp03174k), 2021-01-01
Supplement: d1cp03174k1.pdf [file d1cp03174k1.pdf]

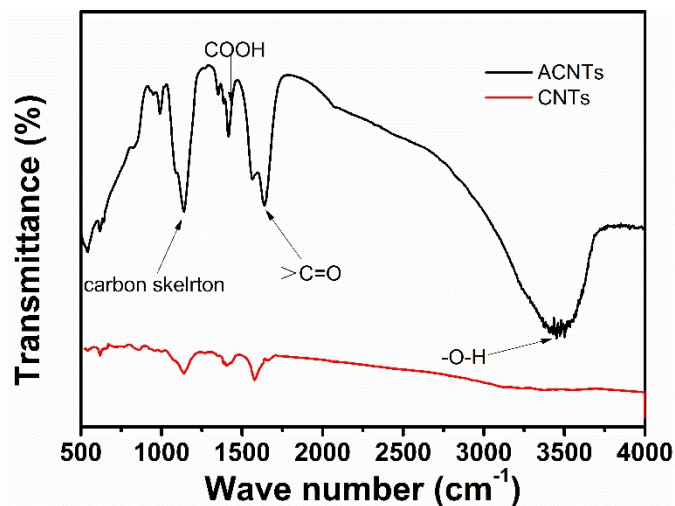

Fig. S1 FT-IR spectra of CNTs and ACNTs.

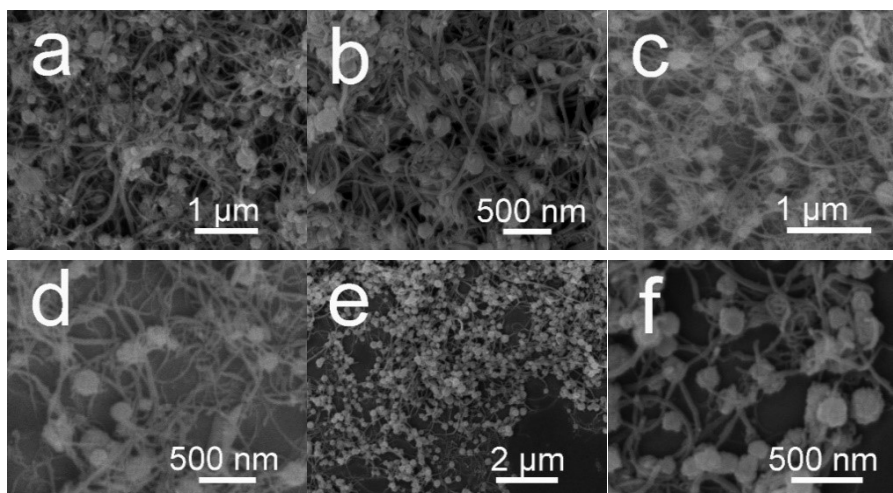

Fig. S2 SEM images of (a-b) ACNT-M0.75 (without addition of CTAB in raw materials), (c-d) ACNT-M0.375 and (e-f) ACNT-M1.5.

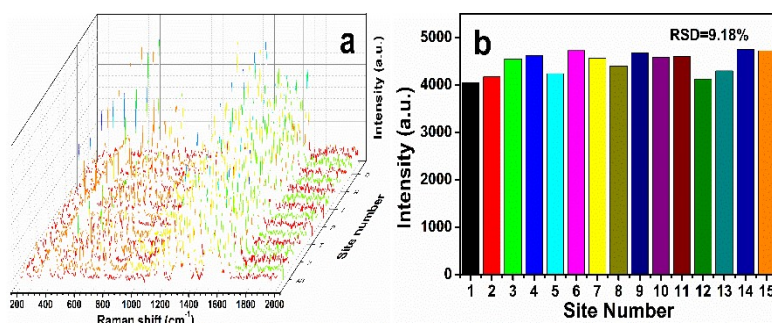

Fig. S3 (a) SERS spectra of R6G collected randomly from 15 spots of ACNTs-M0.75 substrate, (b) SERS intensity distribution at  $612\text{ cm}^{-1}$  corresponding to part (a).

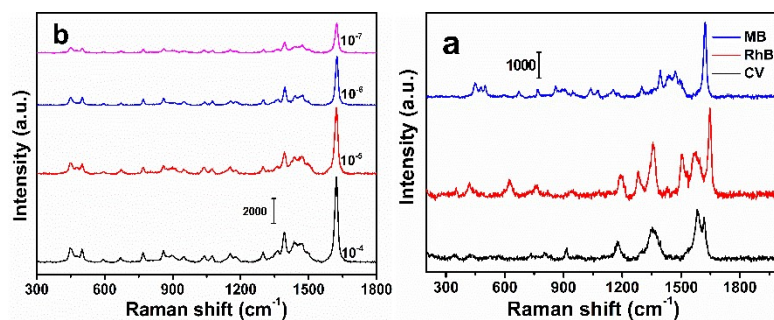

**Fig. S4** (a) SERS spectra of a series of organic dyestuff with concentration of  $10^{-6}$  M (MB, RhB and CV), (b) Raman spectra of MB with different concentrations on ACNTs-M0.5.

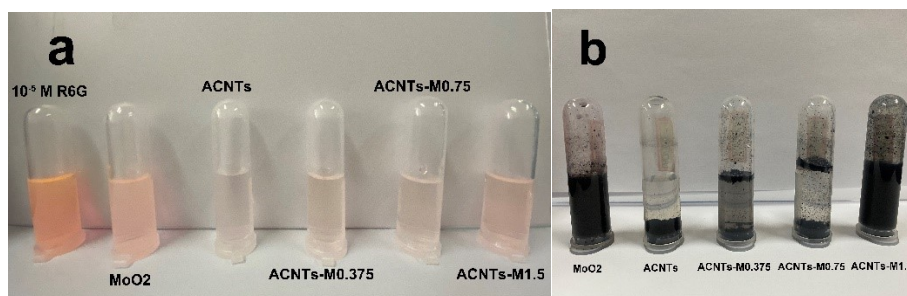

**Fig. S5** the adsorption performance of R6G of different samples, (a) the upper layer of liquid after centrifugation after mixing for 30 seconds and (b) static settlement for 5 minutes.

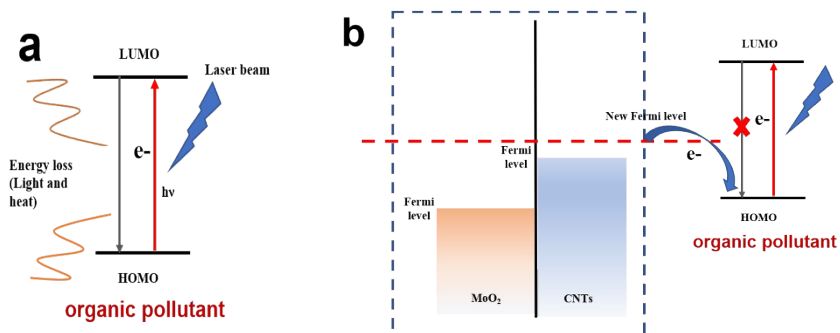

**Fig. S6** Schematic illustration of (a) electron transition under excitation conditions, and (b) charge transfer between the molecule and the substrate.
