# Supplementary material for: A novel sensitive ACNTs–MoO2 SERS substrate boosted by synergistic enhancement effect
Source: Royal Society of Chemistry journal article supplement (doi:10.1039/d1cp03174k), 2021-01-01
Supplement: d1cp03174k2.pdf [file d1cp03174k2.pdf]

## Support information

### A novel sensitive ACNTs-MoO<sub>2</sub> SERS substrate boosted by synergistic enhancement effect

Xiaoyu Zhou<sup>a‡</sup>, Xiaoli Zhao<sup>b‡</sup>, Shuo Gu<sup>a</sup>, Kaiyue Gao<sup>a</sup>, Fazhi Xie<sup>a</sup>, Xiufang Wang<sup>a\*</sup> and Zhi Tang<sup>b\*</sup>

<sup>a</sup>School of Materials and Chemical Engineering, Anhui Jianzhu University, Hefei Anhui, 230601, China.

<sup>b</sup>State Key Laboratory of Environmental Criteria and Risk Assessment, Chinese Research Academy of Environmental Sciences, Beijing 100012, China.

\*Correspondence: E-mail: wxfrye159@sina.com, tzwork@hotmail.com

### The static adsorption experiments of R6G

The samples of the same quality were mixed with 4 mL R6G solution ( $10^{-5}$  M), then let it stand for 30 seconds after ultrasonic dispersion, and took the upper liquid after centrifugation.

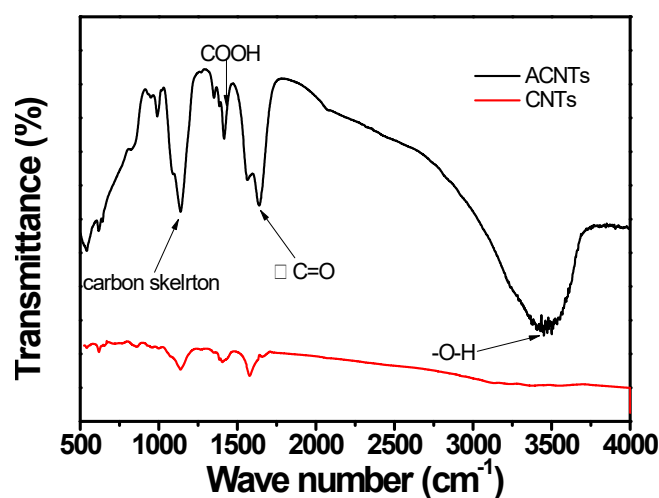

Fig. S1 FT-IR spectra of CNTs and ACNTs.

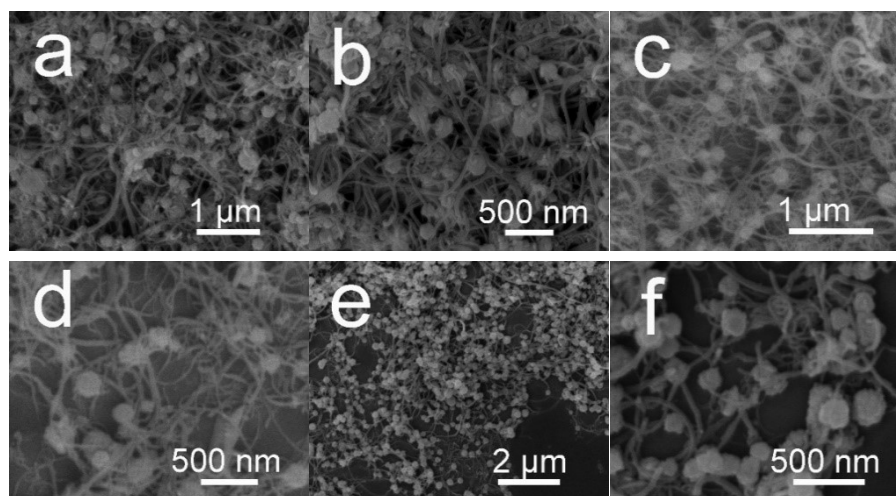

Fig. S2 SEM images of (a-b) ACNT-M0.75 (without addition of CTAB in raw materials), (c-d) ACNT-M0.375 and (e-f) ACNT-M1.5.

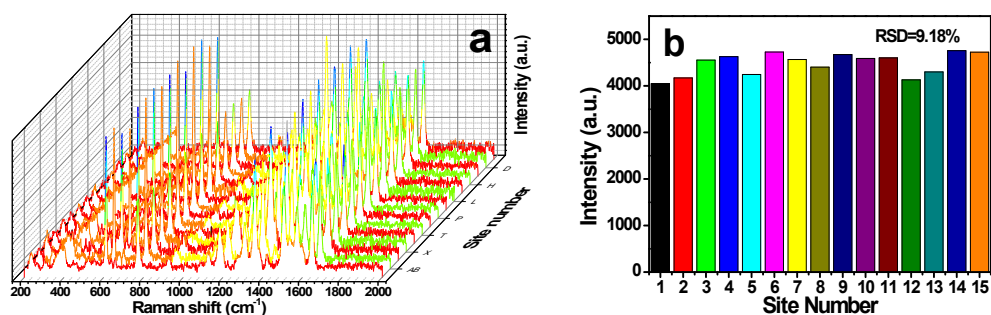

Fig. S3 (a) SERS spectra of R6G collected randomly from 15 spots of ACNTs-M0.75 substrate, (b) SERS intensity distribution at  $612\text{ cm}^{-1}$  corresponding to part (a).

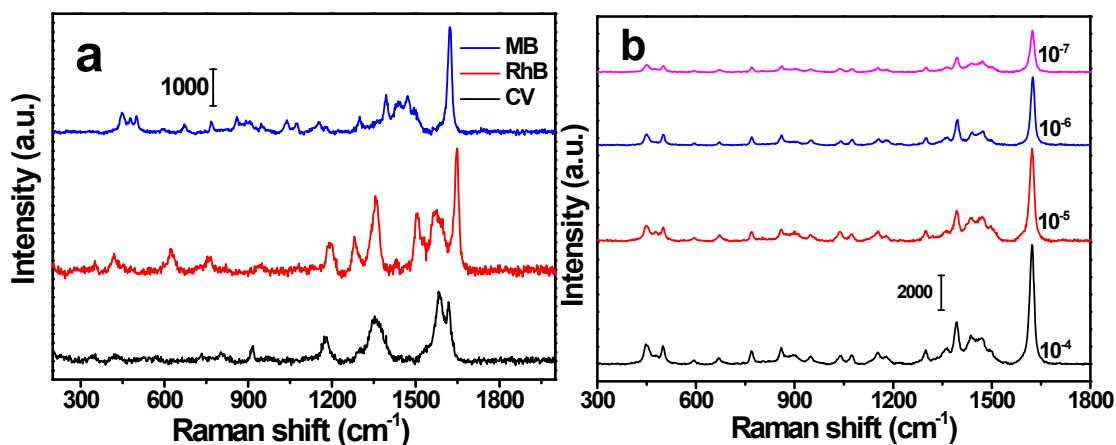

Fig. S4 (a) SERS spectra of a series of organic dyestuff with concentration of  $10^{-6}\text{ M}$  (MB, RhB and CV), (b) Raman spectra of MB with different concentrations on ACNTs-M0.5.

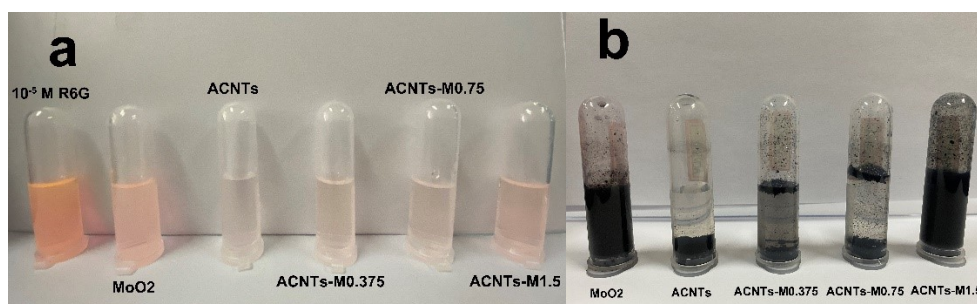

Fig. S5 the adsorption performance of R6G of different samples, (a) the upper layer of liquid after centrifugation after mixing for 30 seconds and (b) static settlement for 5 minutes.

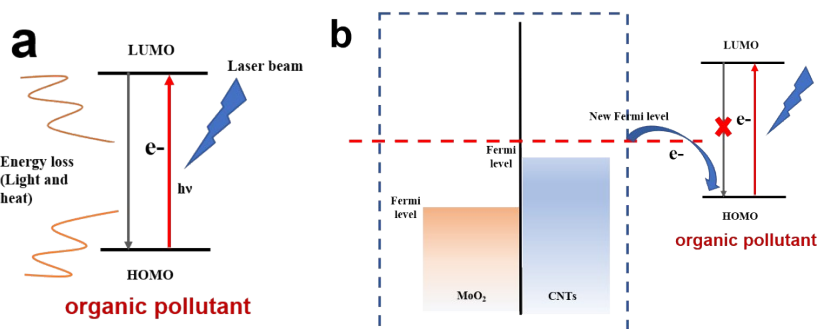

**Fig. S6** Schematic illustration of (a) electron transition under excitation conditions, and (b) charge transfer between the molecule and the substrate.

Conductivity is a macroscopic concept related to free electrons in the metal. According to the DFT calculation results, the ACNTs-M0.75 presents a higher DOS density, which indicates that the composite system possesses a better conductivity. According to previous reports, the Fermi level of metal oxides and CNTs align themselves to have a new single Fermi level<sup>1,2</sup>. When there is no SERS substrate, the fallback of excited state electrons will cause energy loss and thus cannot obtain obvious Raman signals. As shown in Fig.S4b, when organic molecules are adsorbed on the substrate surface, charge transfer can occur between the new Fermi level and the electron orbitals of molecules. The good electrical conductivity of the system promotes the charge transfer between the molecule and the substrate, thus enhances the Raman signals of organic molecules.

**Table S1** The calculation results of  $I_D/I_G$  of different samples.

|           | CNT     | ACNT    | ACNT-M <sub>0.25</sub> | ACNT-M <sub>0.5</sub> | ACNT-M <sub>1</sub> |
|-----------|---------|---------|------------------------|-----------------------|---------------------|
| $I_D$     | 1091.08 | 1258.69 | 1630.91                | 757.81                | 2358.61             |
| $I_G$     | 1475.16 | 1678.44 | 2450.04                | 1138.88               | 3534.07             |
| $I_D/I_G$ | 0.740   | 0.750   | 0.666                  | 0.665                 | 0.667               |

**Table S2** Comparison of the SERS performance based on carbon materials and MoO<sub>2</sub> in the literature.

| Sample                        | Probe molecule   | LOD                                     | EF                                   | Excitation wavelength | Reference                            |
|-------------------------------|------------------|-----------------------------------------|--------------------------------------|-----------------------|--------------------------------------|
| Oxide graphene                | R6G              | $1 \times 10^{-5}$ M                    | $10^4$                               | 514 nm                | 3 <sup>3</sup>                       |
| Ag nanocubes/GO               | 4-chlorobiphenyl | $1 \times 10^{-6}$ M                    | $3.9 \times 10^8$                    | 532 nm                | 4 <sup>4</sup>                       |
| N doped graphene quantum dots | RhB              | $1 \times 10^{-10}$ M                   | -                                    | 514 nm                | 5 <sup>5</sup>                       |
| Porous carbon nanowire        | R6G              | $1 \times 10^{-6}$ M                    | $1 \times 10^6$                      | 532/785 nm            | 6 <sup>6</sup>                       |
| CNT                           | Cd <sup>2+</sup> | 1 ppd                                   | G=10                                 | 514 nm                | 7 <sup>7</sup>                       |
| CNT/AgNPs                     | R6G              | $1 \times 10^{-15}$ M                   | $5.35 \times 10^{11}$                | 532 nm                | 8 <sup>8</sup>                       |
| <b>MoO<sub>2</sub>/GO</b>     | <b>R6G</b>       | <b><math>1 \times 10^{-9}</math> M</b>  | <b><math>1.05 \times 10^7</math></b> | <b>532 nm</b>         | <b>Our previous work<sup>9</sup></b> |
| <b>ACNTs/MoO<sub>2</sub></b>  | <b>R6G</b>       | <b><math>1 \times 10^{-10}</math> M</b> | <b><math>5.13 \times 10^7</math></b> | <b>532 nm</b>         | <b>This work</b>                     |

## References

- 1 P. Gulati, P. Kaur, M. V. Rajam, T. Srivastava, Md. A. Ali, P. Mishra and S. S. Islam, Leukemia biomarker detection by using photoconductive response of CNT electrode: Analysis of sensing mechanism based on charge transfer induced Fermi level fluctuation, *Sensors and Actuators B: Chemical*, 2018, **270**, 45–55.
- 2 M. T. Greiner, M. G. Helander, W.-M. Tang, Z.-B. Wang, J. Qiu and Z.-H. Lu, Universal energy-level alignment of molecules on metal oxides, *Nature Mater*, 2012, **11**, 76–81.
- 3 S. Huh, J. Park, Y. S. Kim, K. S. Kim, B. H. Hong and J.-M. Nam, UV/Ozone-Oxidized Large-Scale Graphene Platform with Large Chemical Enhancement in Surface-Enhanced Raman Scattering, *ACS Nano*, 2011, **5**, 9799–9806.
- 4 C. Zhu, X. Hu and X. Wang, Silver nanocubes/graphene oxide hybrid film on a hydrophobic surface for effective molecule concentration and sensitive SERS detection, *Applied Surface Science*, 2019, **470**, 423–429.
- 5 R. Das, S. Parveen, A. Bora and P. K. Giri, Origin of high photoluminescence yield and high SERS sensitivity of nitrogen-doped graphene quantum dots, *Carbon*, 2020, **160**, 273–286.
- 6 N. Chen, T.-H. Xiao, Z. Luo, Y. Kitahama, K. Hiramatsu, N. Kishimoto, T. Itoh, Z. Cheng and K. Goda, Porous carbon nanowire array for surface-enhanced Raman spectroscopy, *Nat Commun*, 2020, **11**, 4772.
- 7 M. Shaban and A. R. Galaly, Highly Sensitive and Selective In-Situ SERS Detection of Pb<sup>2+</sup>, Hg<sup>2+</sup>, and Cd<sup>2+</sup> Using Nanoporous Membrane Functionalized with CNTs, *Sci Rep*, 2016, **6**, 25307.
- 8 C. Liu, L. Wang, Y. Guo, X. Gao, Y. Xu, Q. Wei, B. Man and C. Yang, Suspended 3D AgNPs/CNT nanohybrids for the SERS application, *Applied Surface Science*, 2019, **487**, 1077–1083.
- 9 J. Chen, K. Sun, Y. Zhang, D. Wu, Z. Jin, F. Xie, X. Zhao and X. Wang, Plasmonic MoO<sub>2</sub> nanospheres assembled on graphene oxide for highly sensitive SERS detection of organic pollutants, *Anal Bioanal Chem*, 2019, **411**, 2781–2791.
